# Supplementary material
Source: PubMed Central journal article supplement (PMC4687685)
Supplement: EMBJ-34-2937-s001.pdf [file EMBJ-34-2937-s001.pdf]

## **Appendix**

### **Table of Contents:**

Appendix Figure S1-S5

Appendix Figure Legends

Appendix Tables S1-S3

Appendix Supplementary Methods

# Appendix Figure S1

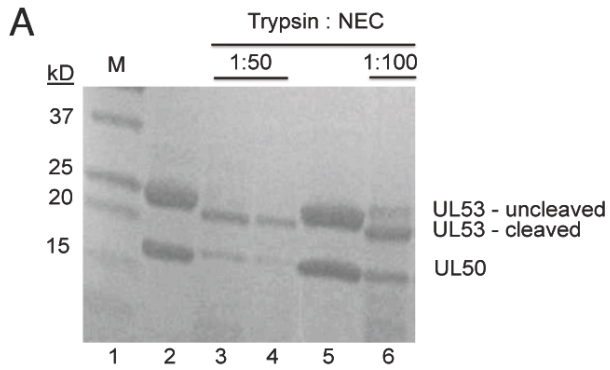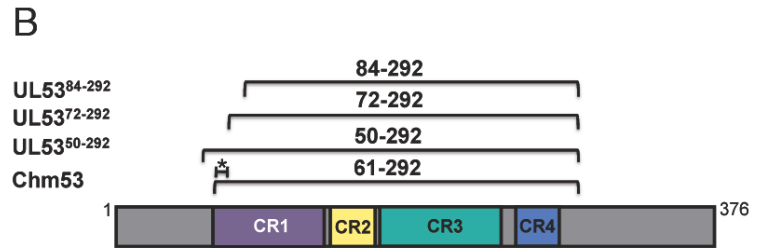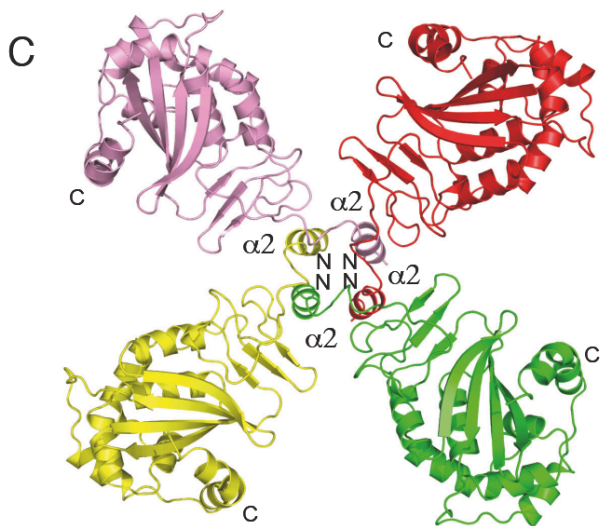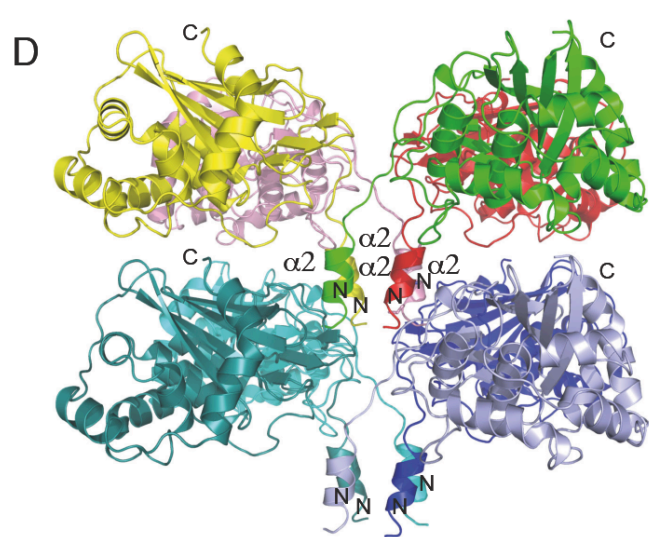

# Appendix Figure S2A

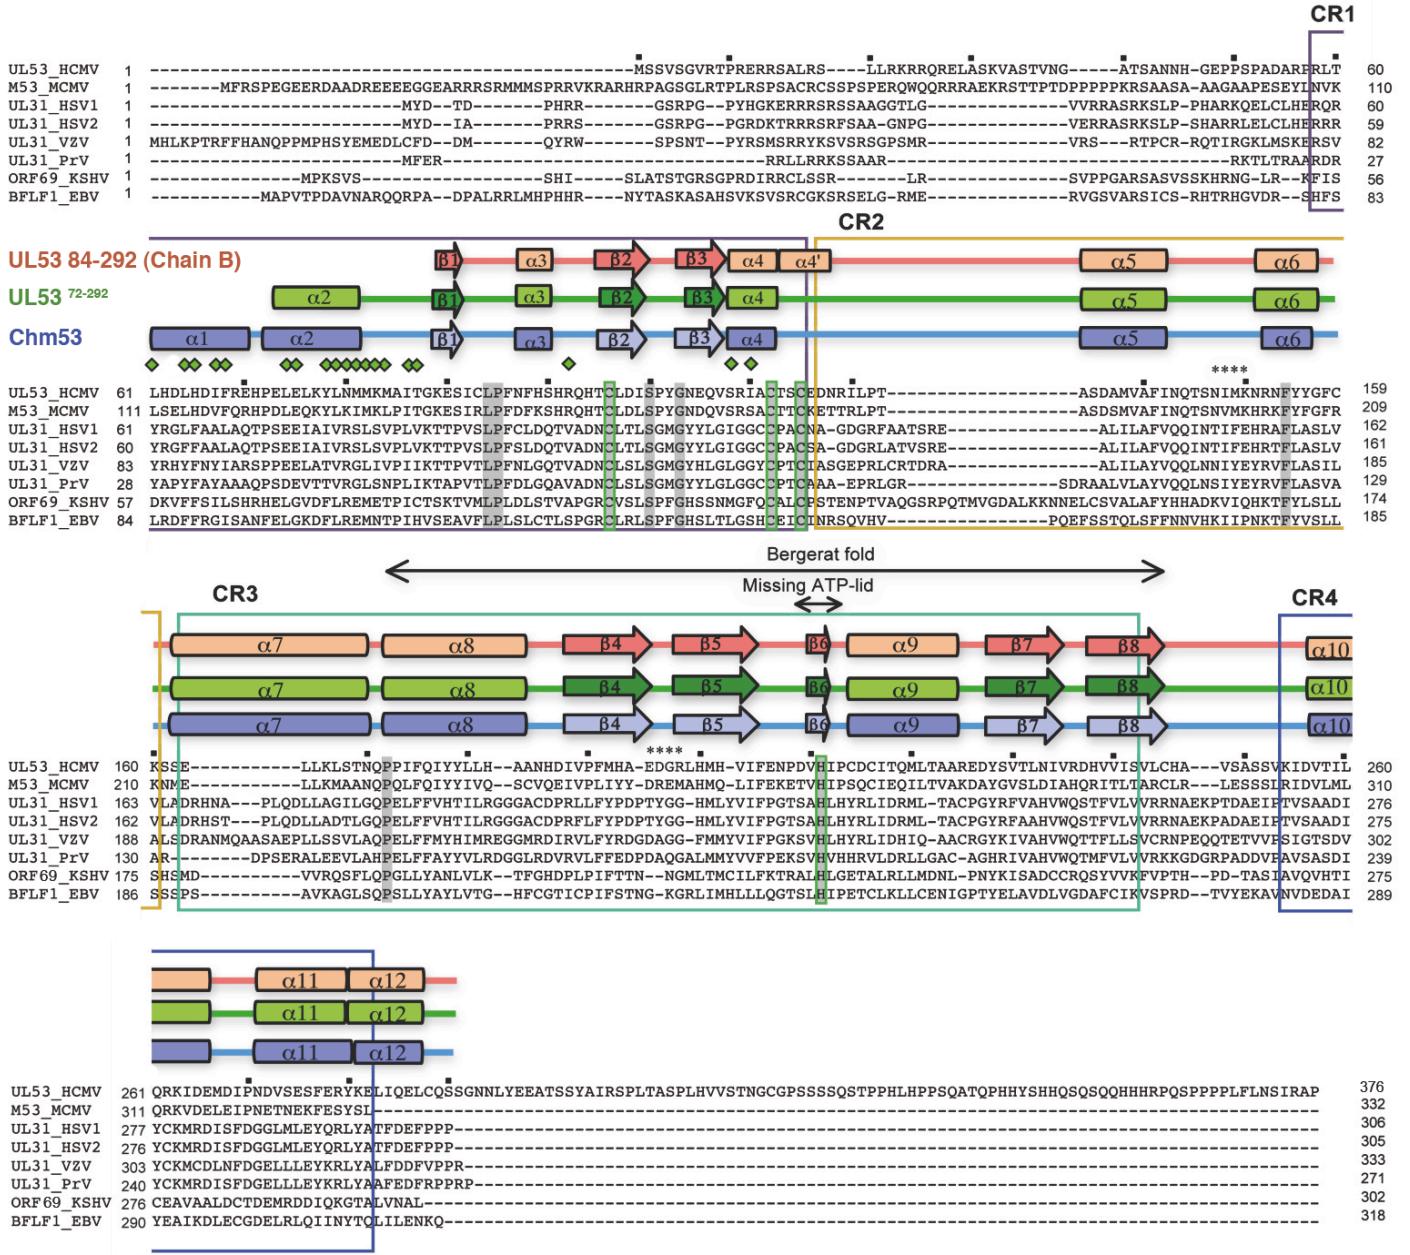

# Appendix Figure S2B

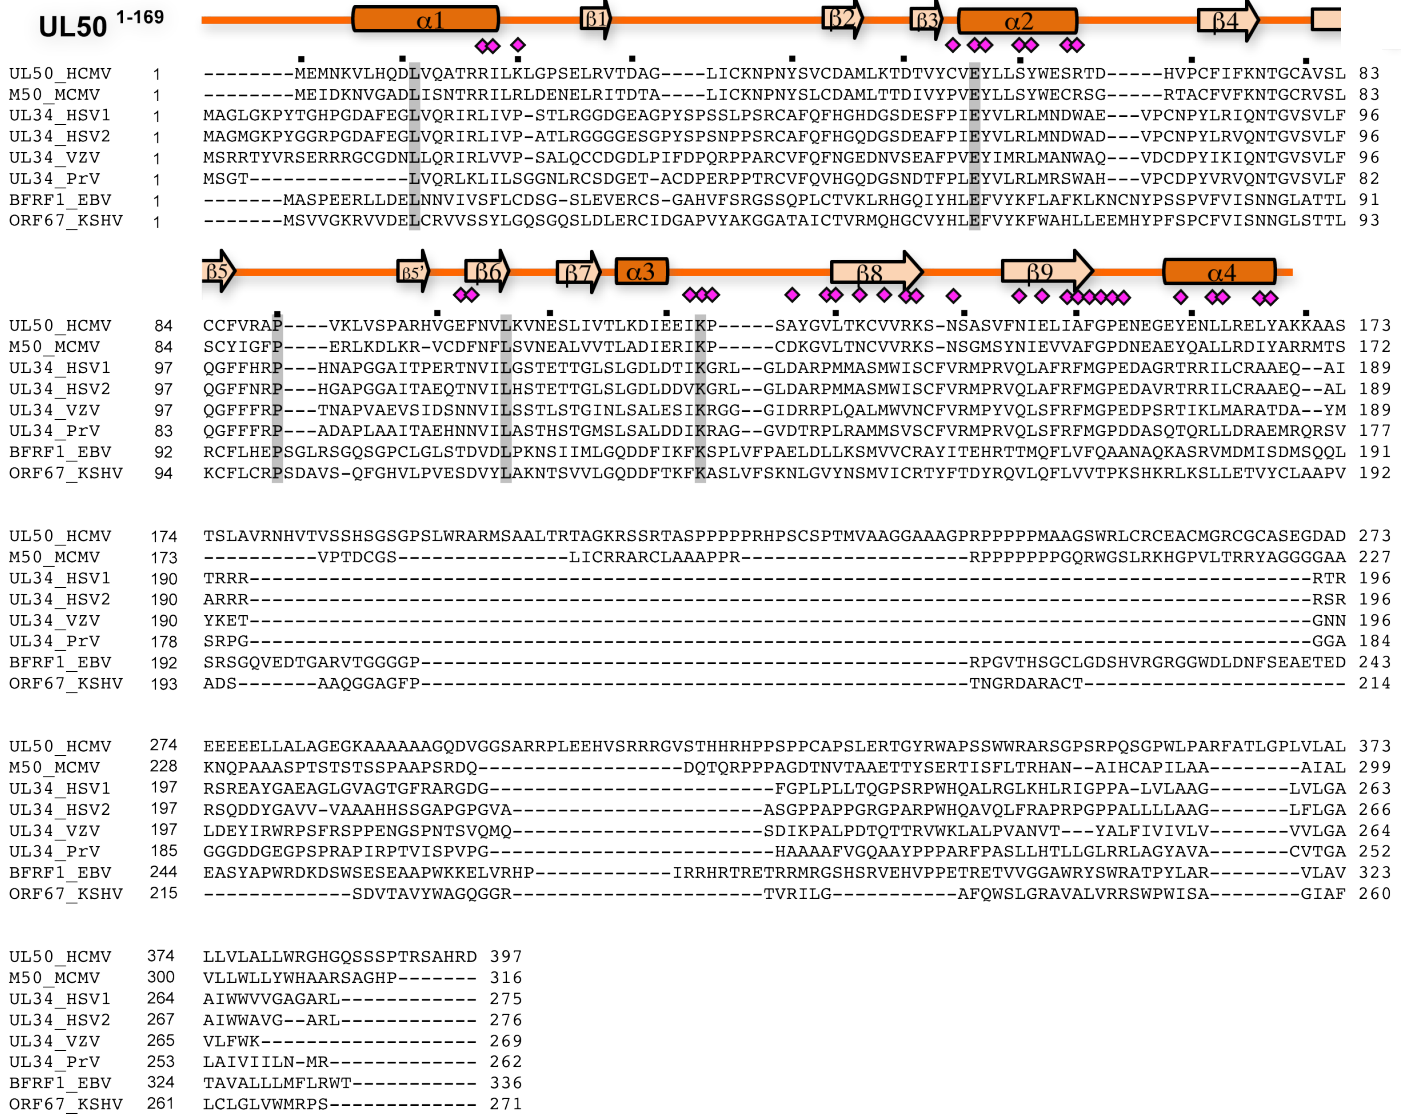

Appendix Figure S3

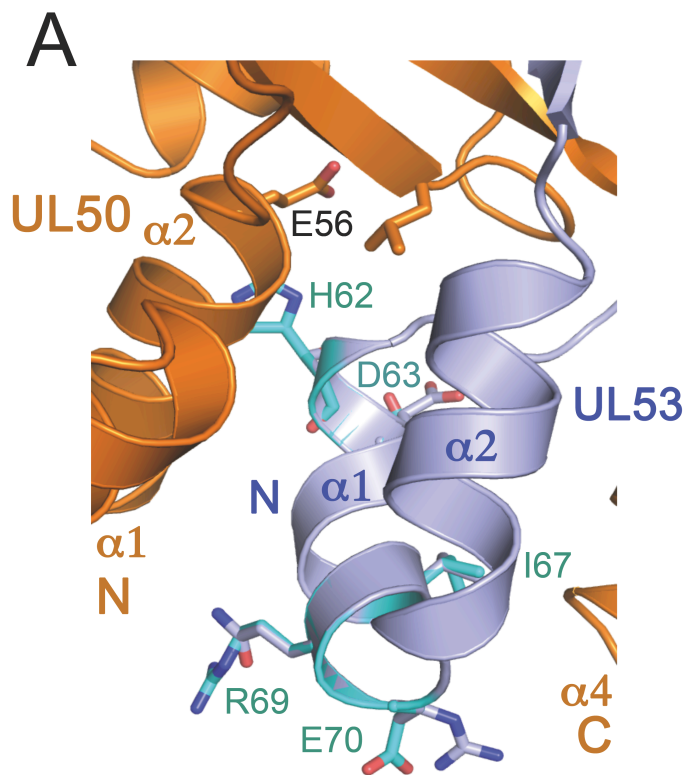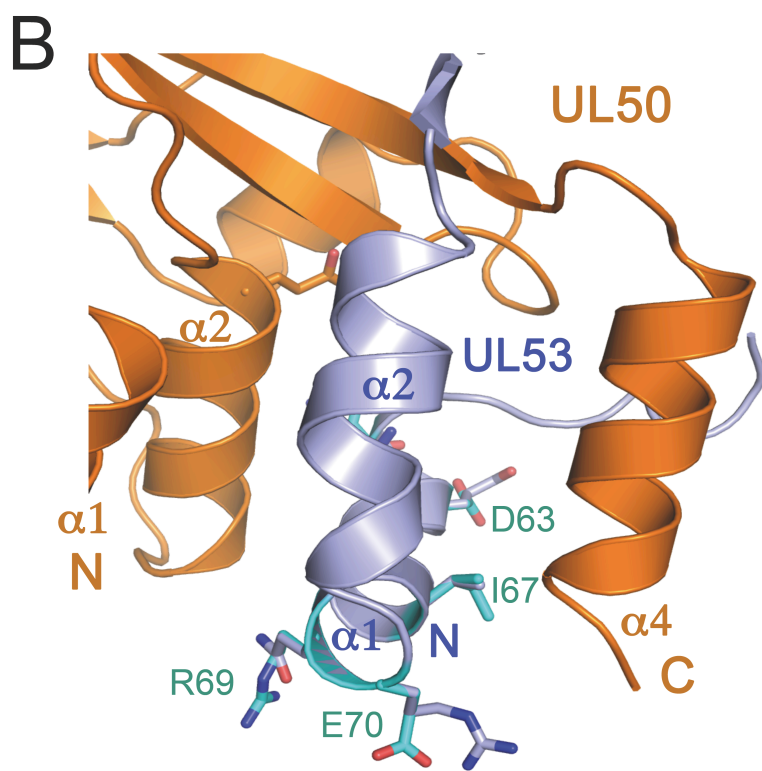

Appendix Figure S4

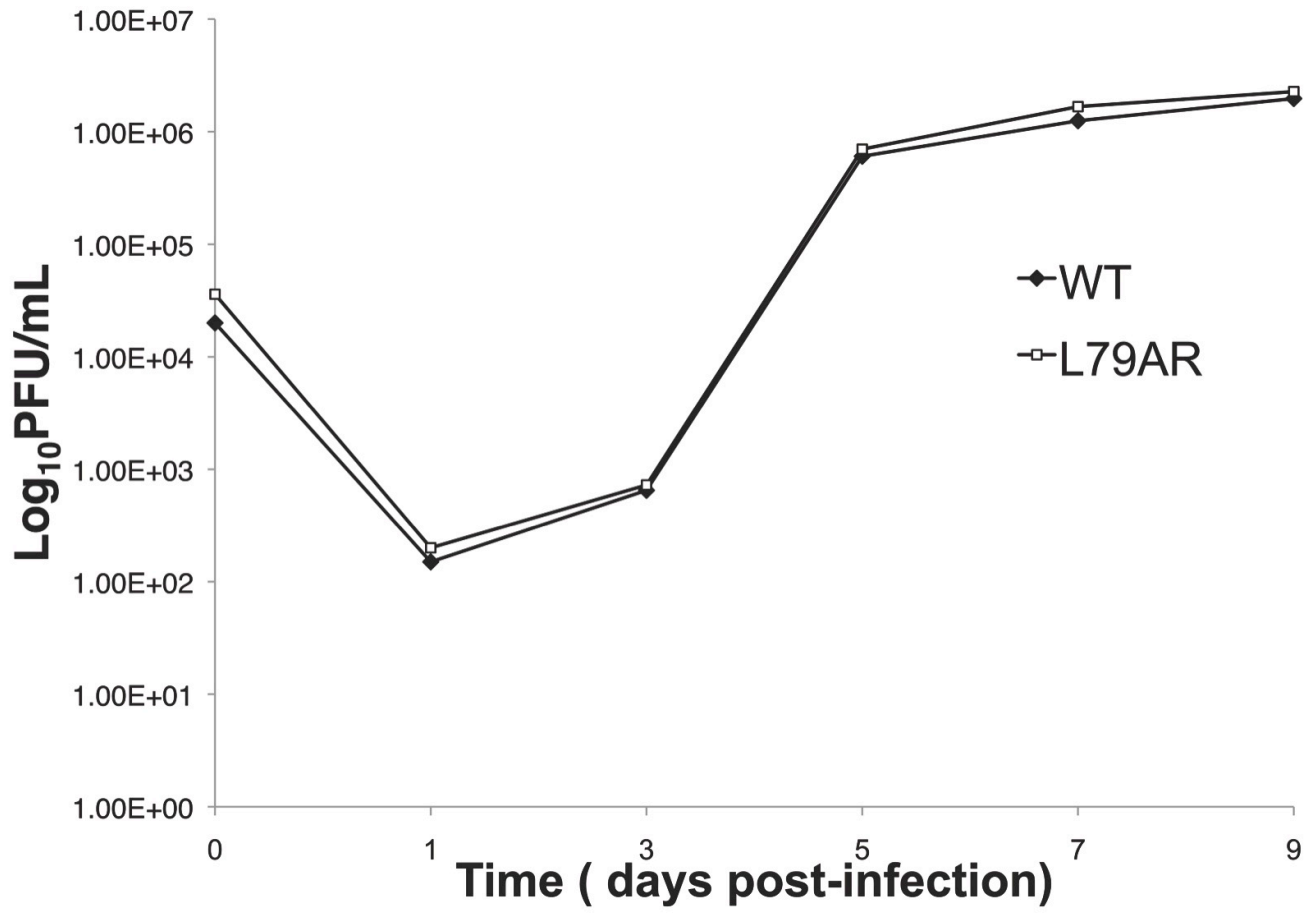

Appendix Figure S5

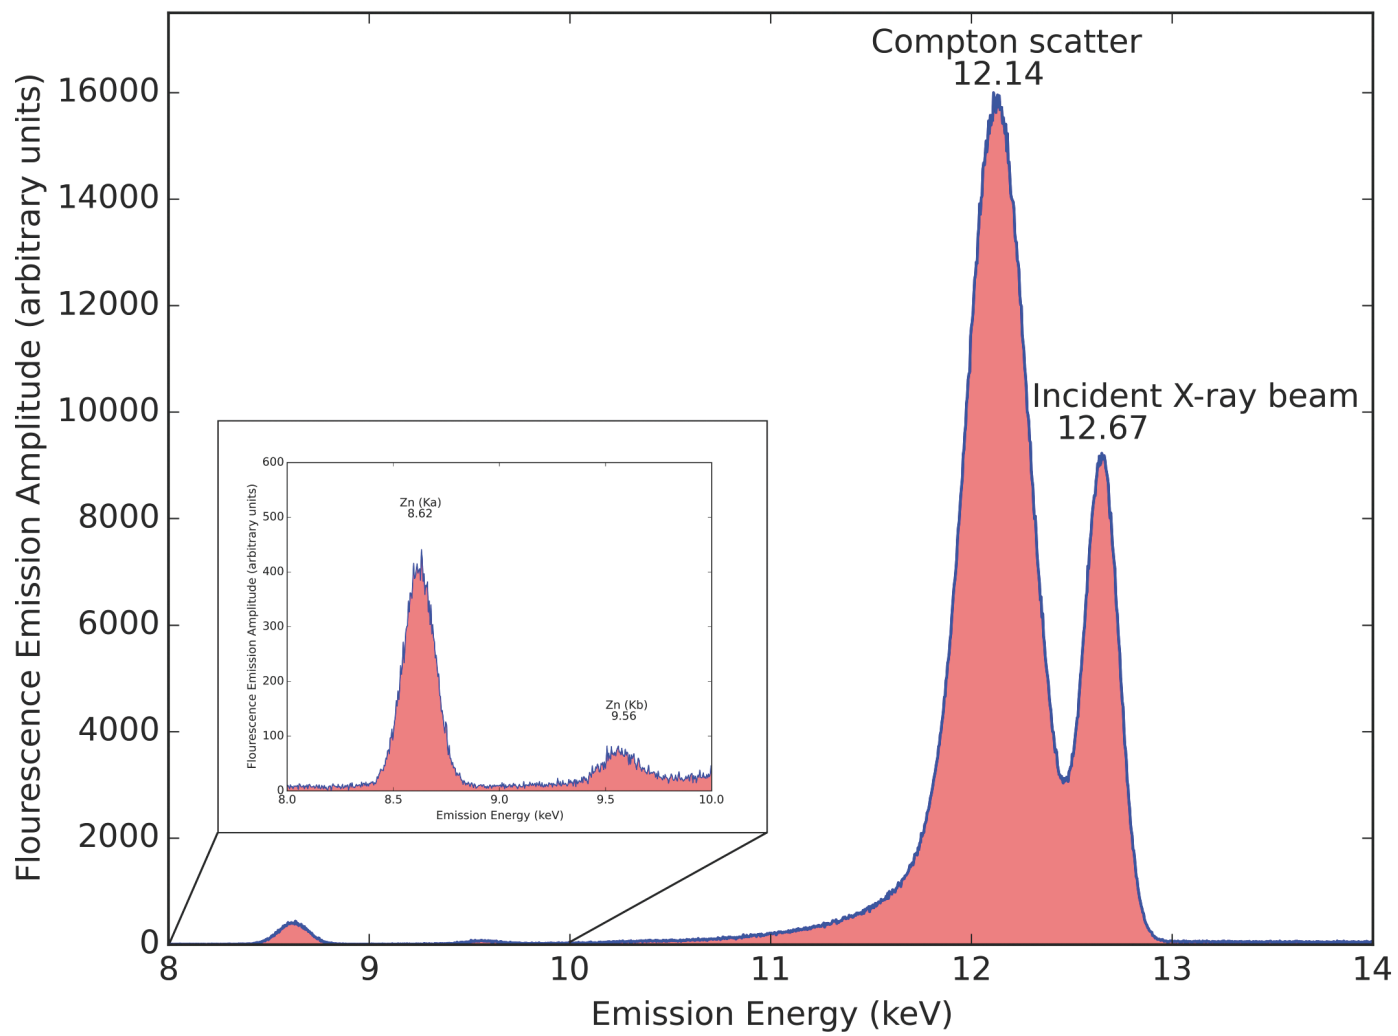

## Appendix figure legends

### Appendix Figure S1. Crystallization studies on UL53: Construct design and packing of UL53 crystals

- A. Trypsin proteolysis studies on purified NEC composed of UL50 encompassing residues 1 to 169 and UL53 encompassing residues 50 to 292. The molecular weight markers are shown in lane 1 with the corresponding weights listed to the left of the Coomassie-stained SDS-PAGE gel. Lanes 2 and 5 have uncut NEC for comparison with trypsin treated NEC. The NEC samples were treated with two different ratios of trypsin to NEC – 1:50, a sample of which is run in lane 3 and 4 at two different dilutions, and 1:100, a sample of which is run in lane 6. In lane 6, the upper most band corresponds to uncleaved UL53 while the second band corresponds to a cleaved UL53 fragment. The bottom band is UL50 and was uncleaved. At a higher trypsin to NEC ratio (1:50), UL53 is fully cut, while UL50 remains uncleaved.
- B. Schematic representation of the UL53 constructs used for crystallization studies. The boundaries of the residues used in each construct are shown above the respective brackets. The conserved regions (CR) across the herpesvirus families are color-coded. In Chm53, which was used to form the NEC, the boundaries correspond to residues 61 to 292 in UL53 except that five residues at the N-terminus were substituted by the corresponding residues in the mouse homolog (M53). These substitutions resulted in greatly improved diffraction of the NEC crystals.
- C. Top view of each monomer of UL53<sup>72-292</sup> clustered around the four-fold rotation axis in the P4 space group through the N-terminus  $\alpha$ 2 helix.
- D. Crystal packing of UL53<sup>72-292</sup> showing the alternating layers of the cluster of  $\alpha$ 2 helices with the rest of the UL53 body.

### Appendix Figure S2. Structure-based sequence alignment of UL50 and UL53 against selected homologs with the interaction interface mapped.

- A. Alignment of the UL53 (UniProtKB identifier: P16794) sequence with homologs from  $\alpha$  (HSV-1 (P10215), HSV-2 (P89454), and varicella zoster virus (VZV (P09283))),  $\beta$  (MCMV (A8E1D1)), and  $\gamma$  (Kaposi's sarcoma herpesvirus (ORF69\_KSHV (F5H982) and Epstein-Barr virus (BFLF1\_EBV (P0CK47))) herpesvirus sub-families. Identical residues are highlighted in gray and the three cysteine residues and one histidine (C<sub>3</sub>H) residue of the zinc finger are boxed in green. The secondary structure elements of UL53<sup>84-292</sup> (chain B, shades of red) are shown with that of UL53<sup>72-292</sup> (shades of green) and Chm53 (shades of purple). The CRs among the herpesviruses are shown in boxes following the same color scheme as in Fig 1D. The Bergerat fold in CR3 of UL53 and the segment that replaces an ATP-binding loop region (ATP-lid) in UL53 is labeled on the alignment. Residues that interact with UL50 are indicated by the green diamonds above the UL53 sequence. Residues that mediate crystal contacts between UL53 (both as a monomer and as part of the NEC) in the different crystal forms obtained are labeled with an asterisk (\*). The identity between the full-length sequence of UL53 with M53 and HSV-1



UL31 is 41.3% and 15.4% respectively, while that between residues encompassing only the CRs (from residues 56 to 282 in UL53 with the homologous residues in M53 and HSV-1 UL31) is 55.1% and 16.0% respectively.

- B. Alignment of the UL50 (P16791) sequence with homologs from the  $\alpha$  (HSV-1 (P10218), HSV-2 (P89457) and VZV (P09280)),  $\beta$  (MCMV (A8E1C8)), and  $\gamma$  (ORF76\_KSHV (F5HA27) and BFRF1\_EBV (P03185)) herpesvirus sub-families. The secondary structure elements of UL50<sup>1-169</sup> (orange) are shown above the sequence. Residues that interact with UL53 are indicated by the pink diamonds above the UL50 sequence. The identity between the full-length sequence of UL50 with M50 and HSV-1 UL34 is 43.4% and 17.8% respectively, while that between residues encompassing only the conserved N-terminal region (from residues 1 to 173 in UL53 with the homologous residues in M53 and HSV-1 UL31) is 60.5% and 17.3% respectively.

### **Appendix Figure S3. Modeling UL53 residues substituted in Chm53 onto the NEC (Chm53:UL50)**

- A. Close-up view of the UL53 helices against the UL50 core. The original residues in the UL53 sequence (cyan) are modeled onto the Chm53 structure and overlaid with the M50 residues (purple) used in the construct. Five UL53 residues (H62, D63, I67, R69, E70) were substituted for their M50 homologs (S62, E63, V67, Q69, R70). The orientation of the structure is the same as that in Fig 5D.
- B. Close-up view of the UL53 helices with the  $\alpha 4$  of UL50. The original residues in the UL53 sequence (cyan) are modeled onto the Chm53 structure and overlaid with the M50 residues (purple) used in the construct. Five UL53 residues (H62, D63, I67, R69, E70) were substituted for their M50 homologs (S62, E63, V67, Q69, R70). Of these five residues, only V67 is involved in heterodimer contacts. The orientation of the structure is the same as that in Fig 5E.

### **Appendix Figure S4. Replication kinetics of the L79 rescued derivative**

The replication kinetics of the rescued derivative of the UL53 mutant L79A, L79AR ( $\square$ ) was compared with WT BADGFP virus ( $\blacklozenge$ ) after inoculation at a multiplicity of infection (MOI) of 0.1 pfu per cell of  $10^5$  human foreskin fibroblast (HFF) cells per well in 24-well plates. For each data point, the supernatants from two wells were pooled on the indicated day post-infection, and titers were calculated by averaging plaque counts from duplicate titrations. Counts from duplicate titrations differed by less than a factor of two for all data points. Error bars are not shown.

### **Appendix Figure S5. Validation of zinc in UL53**

Energy-dispersive X-ray spectroscopy (EDS) spectrum of frozen protein solution. The K- $\alpha 1$  and K- $\beta 1$  emission line peaks for Zn are shown in the inset zoom region between 8 to 10 keV. The large peaks at 12.14 keV and 12.67 keV are generated by Compton scattered X-rays and the incident X-ray beam, respectively.

**Appendix Table S1. Summary of the effects of mutations on UL53 and UL50 at the interaction interface.**

| UL53                                     | K <sub>d</sub> (μM)     | Co-localization with UL50 in co-transfection assays | Growth phenotype of virus containing mutations | Reference                         |
|------------------------------------------|-------------------------|-----------------------------------------------------|------------------------------------------------|-----------------------------------|
| WT                                       | 0.29                    |                                                     | Viable                                         | Sam et. al., 2009, and this study |
| L64A                                     | 4.1                     | nd <sup>b</sup>                                     | Viable                                         | Sam et. al., 2009, and this study |
| F68A                                     | 9.5                     | nd <sup>b</sup>                                     | Viable                                         | Sam et. al., 2009, and this study |
| L74A                                     | 0.63                    | nd <sup>b</sup>                                     | nd <sup>b</sup>                                | Sam et. al., 2009                 |
| E75A                                     | No binding <sup>a</sup> | None                                                | Non-viable                                     | Sam et. al., 2009, and this study |
| L79A                                     | No binding <sup>a</sup> | None                                                | Non-viable                                     | Sam et. al., 2009, and this study |
| M82A                                     | 10-50                   | None                                                | Non-viable                                     | Sam et. al., 2009, and this study |
| UL50                                     | K <sub>d</sub> (μM)     | Co-localization with UL53 in co-transfection assays | Growth phenotype of virus containing mutations | Reference                         |
| WT                                       | 0.29                    |                                                     | Viable                                         | Leigh et. al., 2015               |
| E56A                                     | 30-90                   | None                                                | Non-viable                                     | Leigh et. al., 2015               |
| Y57A                                     | No binding <sup>a</sup> | nd <sup>b</sup>                                     | nd <sup>b</sup>                                | Leigh et. al., 2015               |
| L130A                                    | 7.9                     | None                                                | Non-viable                                     | Leigh et. al., 2015               |
| Δ153                                     | No binding <sup>a</sup> | nd <sup>b</sup>                                     | nd <sup>b</sup>                                | This study                        |
| Y159,L162-AA                             | nd <sup>b</sup>         | None                                                | Non-viable                                     | This study                        |
| <sup>159</sup> YENL <sub>162</sub> -AAAA | nd <sup>b</sup>         | None                                                | Non-viable                                     | This study                        |

<sup>a</sup> Binding was undetected either by isothermal titration calorimetry or by column chromatography

<sup>b</sup> nd; not determined

**Appendix Table S2. Summary of primers for UL50 and UL53 constructs in protein expression vectors and mutant plasmids for crystallization and gel filtration studies**

| For transfer of UL50 and UL53 genes from Inteine plasmids (Sam, 2009) into a pGEX6p and pET15b vector respectively |               |                                                                                                                    |
|--------------------------------------------------------------------------------------------------------------------|---------------|--------------------------------------------------------------------------------------------------------------------|
| <b>Plasmid</b>                                                                                                     | <b>Primer</b> | <b>Sequence</b>                                                                                                    |
| Int-UL50<br>(residues 1-169)                                                                                       | Int-UL50_Fw   | CAGAATGCTGGT <b>CATATG</b> GAGATGAACAAGGTTCTC                                                                      |
|                                                                                                                    | Int-UL50_Rv   | <u>CTGTACGCCAAGTAAGAATTCTCGACGTCGTTGGCG</u>                                                                        |
| Int-UL53<br>(residues 50-292)                                                                                      | Int-UL53_Fw   | CAGAATGCTGGT <b>CATATG</b> TCGCCGGCCGAC                                                                            |
|                                                                                                                    | Int-UL53_Rv   | <u>CAGTCCAGCGGCTAAGAATTCCTCGAGCCC</u>                                                                              |
| UL53 mutants                                                                                                       |               |                                                                                                                    |
| <b>Plasmid</b>                                                                                                     | <b>Primer</b> | <b>Sequence</b>                                                                                                    |
| 61-292                                                                                                             | start61_Fw    | <i>CAG GGG CCC CTG GGA TCC CTG CAC GAC CTG CAC</i>                                                                 |
| 72-292                                                                                                             | start72_Fw    | <i>CAG GGG CCC CTG GGA TCC <u>CCC GAA CTG GAG CTC</u></i>                                                          |
| 84-292                                                                                                             | start84_Fw    | <i>G GGG CCC CTG GGA TCC <u>ATG GCC ATC ACG GGC</u></i>                                                            |
| Chm53                                                                                                              | Chm53_1a_Fw   | <i>CTG GGA TCC ATG CTG <u>AAG CTG AGC GAG CTG CAC GAC GTC</u></i><br><i><u>TTC CAG CGC CAC CCC GAA CTG GAG</u></i> |
| UL50 mutant                                                                                                        |               |                                                                                                                    |
| <b>Plasmid</b>                                                                                                     | <b>Primer</b> | <b>Sequence</b>                                                                                                    |
| 1-152                                                                                                              | end152_Fw     | <u>GAG CTC ATC GCC TTC GGA <b>TAA</b> GCC GCG TCG AC</u>                                                           |

The restriction sites (NdeI and EcoRI) are shown in bold. In italics is the sequence for precision protease, while the gene sequences are underlined.

**Appendix Table S3. (A). Summary of mutant constructs in the HCMV BAC or pcDNA plasmid background. (B). Primer sequences for changes introduced into the HCMV AD160 BAC of UL53 and UL50**

| <b>A. Construct</b>                     | <b>Genetic Background</b> | <b>Source</b>                  | <b>Change Introduced</b>                                                               |
|-----------------------------------------|---------------------------|--------------------------------|----------------------------------------------------------------------------------------|
| UL53 sequence                           |                           |                                |                                                                                        |
| E75A                                    | pBADGFP                   | Sharma <i>et. al.</i> 2014 (1) | Mutation of residue E75 to alanine                                                     |
| L79A                                    | pBADGFP                   | Sharma <i>et. al.</i> 2014 (1) | Mutation of residue L79 to alanine                                                     |
| M82A                                    | pBADGFP                   | Sharma <i>et. al.</i> 2014 (1) | Mutation of residue M82 to alanine                                                     |
| E75AR                                   | E75A pBADGFP              | This study                     | Restored the WT UL53 coding sequence                                                   |
| L79AR                                   | L79A pBADGFP              | This study                     | Restored the WT UL53 coding sequence                                                   |
| M82AR                                   | M82A pBADGFP              | This study                     | Restored the WT UL53 coding sequence                                                   |
| Chm53                                   | 53-F pBADGFP              | Sharma <i>et. al.</i> 2014 (1) | Introduced M53 helix 1 sequence corresponding to the construct used in crystallization |
| C106S                                   | 53-F pBADGFP              | Sharma <i>et. al.</i> 2014 (1) | Mutation of residue C106 to serine                                                     |
| H211A                                   | pBADGFP                   | This study                     | Mutation of residue H211 to alanine                                                    |
| C106SR                                  | C106S 53-F pBADGFP        | This study                     | Restored the WT UL53 coding sequence                                                   |
| H211AR                                  | H211A53-F pBADGFP         | This study                     | Restored the WT UL53 coding sequence                                                   |
| Plasmid constructs                      |                           |                                |                                                                                        |
| L79A                                    | pcDNA FLAG-UL53           | Sam <i>et. al.</i> , 2009 (2)  | Mutation of residue L79 to alanine                                                     |
| C122S                                   | pcDNA FLAG-UL53           | Sam <i>et. al.</i> , 2009 (2)  | Mutation of residue C122 to serine                                                     |
| C125S                                   | pcDNA FLAG-UL53           | Sam <i>et. al.</i> , 2009 (2)  | Mutation of residue C125 to serine                                                     |
| H211A                                   | pcDNA FLAG-UL53           | Sam <i>et. al.</i> , 2009 (2)  | Mutation of residue H211 to alanine                                                    |
| SI-AA                                   | pcDNA FLAG-UL53           | Sam <i>et. al.</i> , 2009 (2)  | Mutation of residues S118 and I120 to alanine                                          |
| UL50 sequence                           |                           |                                |                                                                                        |
| 2A <sub>/159</sub> AENA <sub>162/</sub> | pBADGFP                   | Sharma <i>et. al.</i> 2014 (1) | Mutation of residues Y159 and L162 to alanine                                          |
| 4A <sub>/159</sub> AAA <sub>162/</sub>  | pBADGFP                   | Sharma <i>et. al.</i> 2014 (1) | Mutation of residues Y159, E160, N161 and L162 to alanine                              |
| Plasmid constructs                      |                           |                                |                                                                                        |
| 2A <sub>/159</sub> AENA <sub>162/</sub> | pcDNA HA-UL50             | Sam <i>et. al.</i> , 2009 (2)  | Mutation of residues Y159 and L162 to alanine                                          |
| 4A <sub>/159</sub> AAAA <sub>162/</sub> | pcDNA HA-UL50             | Sam <i>et. al.</i> , 2009 (2)  | Mutation of residues Y159, E160, N161 and L162 to alanine                              |

**B.**

| UL53 BADGFP constructs |           |                                                                                                                               |
|------------------------|-----------|-------------------------------------------------------------------------------------------------------------------------------|
| Construct              | Primer    | Sequence                                                                                                                      |
| E75A                   | E75A Fw   | CGACCTGCACGACATCTTCCGCGAGCACCCCGAACTGGCCCTCAAGTACCTTAA<br>CATGATTAGGGATAACAGGGTAATCG                                          |
|                        | E75A Rv   | TGCCCGTGATGGCCATCTTCATCATGTTAAGGTAAGTACTTGAGGGCCAGTTCGGGGT<br>GCTCGCGGAGCCAGTGTACAACCAATTAACC                                 |
| L79A                   | L79A Fw   | CGACATCTTCCGCGAGCACCCCGAACTGGAGCTCAAGTACGCCAACATGATGAA<br>GATGGCCTAGGGATAACAGGGTAATCGATTT                                     |
|                        | L79A Rv   | AGATGGACTCTTTGCCCGTGATGGCCATCTTCATCATGTTGGCGTACTTGAGCT<br>CCAGTTCGCCAGTGTACAACCAATTAACC                                       |
| M82A                   | M82A Fw   | CGAGCACCCCGAACTGGAGCTCAAGTACCTTAACATGGCCAAGATGGCCATCAC<br>GGGCAATAGGGATAACAGGGTAATCG                                          |
|                        | M82A Rv   | GTAAGCAGATGGACTCTTTGCCCGTGATGGCCATCTTGCCATGTTAAGGTAAGTACT<br>TGAGCTGCCAGTGTACAACCAATTAACC                                     |
| E75AR                  | E75AR Fw  | CGACCTGCACGACATCTTCCGCGAGCACCCCGAACTGGAGCTCAAGTACCTTAA<br>CATGATTAGGGATAACAGGGTAATCG                                          |
|                        | E75AR Rv  | TGCCCGTGATGGCCATCTTCATCATGTTAAGGTAAGTACTTGAGCTCCAGTTCGGGGT<br>GCTCGCGGAGCCAGTGTACAACCAATTAACC                                 |
| L79AR                  | L79AR Fw  | CGACATCTTCCGCGAGCACCCCGAACTGGAGCTCAAGTACCTTAACATGATGAA<br>GATGGCCTAGGGATAACAGGGTAATCGATTT                                     |
|                        | L79AR Rv  | AGATGGACTCTTTGCCCGTGATGGCCATCTTCATCATGTTAAGGTAAGTACTTGAGCTC<br>CAGTTCGCCAGTGTACAACCAATTAACC                                   |
| M82AR                  | M82AR Fw  | CGAGCACCCCGAACTGGAGCTCAAGTACCTTAACATGATGAAGATGGCCATCAC<br>GGGCAATAGGGATAACAGGGTAATCG                                          |
|                        | M82AR Rv  | GTAAGCAGATGGACTCTTTGCCCGTGATGGCCATCTTCATCATGTTAAGGTAAGTACTT<br>GAGCTGCCAGTGTACAACCAATTAACC                                    |
| Chm53                  | CHM53Fw   | GGCGAACCGCCGTCGCCGCGCCGACGCGCGCCCGCGCCTGAAGCTGAGCGAG<br>CTGCACGACGTCTTCCAGCGCCACCCCGAACTGGAGCTCAAGTAGGGATAACA<br>GGGTAAT      |
|                        | CHM53 Rv  | CTTCATCATGTTAAGGTAAGTACTTGAGCTCCAGTTCGGGGTGGCGCTGGAAGACGTC<br>GTGCAGCTCGCTCAGCTTCCAGGCGCGGGCGCGCTCG<br>GCCAGTGTACAACCAATTAACC |
| C106S                  | C106S Fw  | TACCCTTCAATTTCCAACCTCGCACCCGGCAGCACACCTCCCTCGACATCTCGCCGT<br>ACGGCATAGGGATAACAGGGTAATCG                                       |
|                        | C106S Rv  | GCGAGACCTGCTCGTTGCCGTACGGCGAGATGTGCGAGGAGGTGTGCTGCCG<br>GTGCGAGTGGCCAGTGTACAACCAATTAACC                                       |
| C106SR                 | C106SR Fw | TACCCTTCAATTTCCAACCTCGCACCCGGCAGCACACCTGCCTCGACATCTCGCCGT<br>ACGGCATAGGGATAACAGGGTAATCG                                       |
|                        | C106SR Rv | GCGAGACCTGCTCGTTGCCGTACGGCGAGATGTGCGAGGAGGTGTGCTGCCG<br>GTGCGAGTGGCCAGTGTACAACCAATTAACC                                       |
| H211A                  | H211A Fw  | GTTGCACATGCACGTCATCTTCGAAAACCCCGACGTGGCCATCCCCTGCGACTG<br>CATCACTAGGGATAACAGGGTAATCG                                          |
|                        | H211A Rv  | GCGCCGCCGTGAGCATCTGCGTGATGCAGTCGCAGGGGATGGCCACGTCGGG<br>GTTTTCGAGCCAGTGTACAACCAATTAACC                                        |
| H211AR                 | H211AR Fw | GTTGCACATGCACGTCATCTTCGAAAACCCCGACGTGCACATCCCCTGCGACTG<br>CATCACTAGGGATAACAGGGTAATCG                                          |
|                        | H211AR Rv | GCGCCGCCGTGAGCATCTGCGTGATGCAGTCGCAGGGGATGTGCACGTCGGG<br>GTTTTCGAGCCAGTGTACAACCAATTAACC                                        |

| UL50 BADGFP constructs |        |                                                                                               |
|------------------------|--------|-----------------------------------------------------------------------------------------------|
| Construct              | Primer | Sequence                                                                                      |
| 2A/159AENA162/         | 2A Fw  | TCGAGCTCATCGCCTTCGGACCCGAAAACGAGGGCGAGGCAGAGAATGC<br>TCTGCGCGAGCTGTACGCCTAGGGATAACAGGGTAATCG  |
|                        | 2A Rv  | ACGTCGACGCGGCTTTCTTGGCGTACAGCTCGCGCAGAGCATTCTCTGCC<br>TCGCCCTCGTTTTCGGGGCCAGTGTTACAACCAATTAAC |
| 4A/159AAA162/          | 2A Fw  | TCGAGCTCATCGCCTTCGGACCCGAAAACGAGGGCGAGGCAGCCGCGGC<br>TCTGCGCGAGCTGTACGCCTAGGGATAACAGGGTAATCG  |
|                        | 2A Rv  | ACGTCGACGCGGCTTTCTTGGCGTACAGCTCGCGCAGAGCCGCGGCTGC<br>CTCGCCCTCGTTTTCGGGGCCAGTGTTACAACCAATTAAC |
| 2AR                    | 2A Fw  | TCGAGCTCATCGCCTTCGGACCCGAAAACGAGGGCGAGTACGAGAATCTG<br>CTGCGCGAGCTGTACGCCTAGGGATAACAGGGTAATCG  |
|                        | 2A Rv  | ACGTCGACGCGGCTTTCTTGGCGTACAGCTCGCGCAGCAGATTCTCGTAC<br>TCGCCCTCGTTTTCGGGGCCAGTGTTACAACCAATTAAC |

1. Sharma, M., J. P. Kamil, M. Coughlin, N. I. Reim, and D. M. Coen. 2014. Human cytomegalovirus UL50 and UL53 recruit viral protein kinase UL97, not protein kinase C, for disruption of nuclear lamina and nuclear egress in infected cells. *J Virol* 88:249-62.
2. Sam, M. D., B. T. Evans, D. M. Coen, and J. M. Hogle. 2009. Biochemical, biophysical, and mutational analyses of subunit interactions of the human cytomegalovirus nuclear egress complex. *J. Virol.* 83:2996-3006.
3. Tischer, B. K., G. A. Smith, and N. Osterrieder. 2010. En passant mutagenesis: a two step markerless red recombination system. *Methods Mol Biol* 634:421-30.
4. Tischer, B. K., J. von Einem, B. Kaufer, and N. Osterrieder. 2006. Two-step red-mediated recombination for versatile high-efficiency markerless DNA manipulation in *Escherichia coli*. *Biotechniques* 40:191-7.

## **Appendix Supplementary Methods**

### **Trypsin proteolysis of the NEC**

Trypsin proteolysis was conducted using the Proti-Ace kit from Hampton Research following the manufacturer's instructions. Briefly, 170 mM of NEC was incubated in either a 1:50 or 1:100 ratio of trypsin (0.01 mg/mL) to NEC at 37° for 1 hour. The reaction was quenched by the addition of 4X SDS-PAGE sample buffer to each sample and the samples were run on an SDS polyacrylamide gel. The products from the digest were cut from the gel and the sequences analyzed using mass spectrometry by the Taplin Mass Spectrometry Facility at Harvard Medical School.

### **Viruses**

HCMV replication following infection at a multiplicity of infection of 0.1 was assessed as described previously (Sharma et al, 2014). Titration was done by infecting  $1 \times 10^5$  HFF cells per well (in a 24-well plate) with serial dilutions of harvested virus samples for 1 h, following which the inocula were replaced with media containing methylcellulose. After 14 days, the monolayers were stained with crystal violet and plaques were counted using a dissecting microscope. Titers represent average values from duplicate samples.
